# Supplementary material for: RNAi-based small molecule repositioning reveals clinically approved urea-based kinase inhibitors as broadly active antivirals
Source: PLoS Pathog. 2019 Mar 18;15(3):e1007601. doi: 10.1371/journal.ppat.1007601 (PMC6422253; doi:10.1371/journal.ppat.1007601)
Supplement: S6 Table — (XLSX) [file ppat.1007601.s018.xlsx]

## Sheet: Table_S6
Table S6: Differentially required gene categories associated with NF-kB activation
GO domain biological process	GO domain cellular compartment	GO domain molecular function	KEGG	Reactome
Activation of NF-kappaB-inducing kinase activity	CD40 receptor complex		Cytosolic DNA sensing pathway	Cytosolic sensors of pathogen-associated DNA
Nucleotide-binding domain, leucine rich repeat containing receptor signaling pathway	IkappaB kinase complex			FCERI mediated NF-kB activation
Nucleotide-binding oligomerization domain containing signaling pathway				Interleukin-1 signaling
Positive regulation of NF-kappaB transcription factor activity				IRAK1 recruits IKK complex
Positive regulation of type I interferon production				IRAK1 recruits IKK complex upon TLR7/8 or 9 stimulation
Response to hydroperoxide				NF-kB activation through FADD/RIP-1 pathway mediated by caspase-8 and -10e, RIP-mediated NFkB activation via ZBP1
				TRAF6 mediated NF-kB activation
				ZBP1(DAI) mediated induction of type I IFNs
